# Supplementary material
Source: PubMed Central journal article supplement (PMC3138677)
Supplement: supp_blood-2011-01-333070_TableS1.pdf [file supp_blood-2011-01-333070_TableS1.pdf]

| <b>Factor</b>           | <b>n</b> | <b>Estimate (SE), %</b> |               | <b>P value</b> |
|-------------------------|----------|-------------------------|---------------|----------------|
|                         |          | <b>Year 1</b>           | <b>Year 5</b> |                |
| <b>Race</b>             |          |                         |               |                |
| Non-white               | 51       | 46.6 (6.9)              | 37.1 (11.1)   | .084           |
| White                   | 139      | 60.7 (4.3)              | 51.0 (6.3)    |                |
| <b>Conditioning</b>     |          |                         |               |                |
| TBI-based               | 165      | 55.1 (3.9)              | 45.4 (5.5)    | .17            |
| Non-TBI                 | 25       | 69.4 (9.9)              | 62.5 (27.1)   |                |
| <b>T-cell depletion</b> |          |                         |               |                |
| Yes                     | 96       | 50.7 (5.1)              | 43.9 (6.2)    | .15            |
| No                      | 94       | 63.3 (5.2)              | 50.2 (10.7)   |                |
| <b>CMV status</b>       |          |                         |               |                |
| R+/D+                   | 45       | 52.3 (7.5)              | 44.8 (10.5)   | .39            |
| R+/D-                   | 36       | 47.4 (8.6)              | 36.5 (14.5)   |                |
| R-/D+                   | 44       | 63.6 (7.1)              | 48.8 (10.1)   |                |
| R-/D-                   | 65       | 60.4 (6.2)              | 53.4 (9.4)    |                |

\* *P* values are from log-rank tests. TBI, total body irradiation; CMV, cytomegalovirus; R, recipient; D, donor.
